# Supplementary material for: Understanding Italian Consumers’ Perception of Safety in Animal Food Products
Source: MDPI journal article supplement (doi:10.3390/foods11223739), 2022-11-21
Supplement: s1 [file s1]

## Supplementary material

**Table S1. Complete ANOVA models and effect of size ( $\eta^2 = SS \text{ factor} / SS \text{ total}$ ; partial  $\eta^2 = SS \text{ model} / (SS \text{ model} + SS \text{ error})$ ), including fixed models (a) and mixed models (b).**

a). Fixed ANOVA models (output of Type III Sum of Squares for variable 'perceived safety'):

|         | Source              | DF    | Sum of squares (SS) | Mean of squares | F      | p value | $\eta^2$ | Partial $\eta^2$ |
|---------|---------------------|-------|---------------------|-----------------|--------|---------|----------|------------------|
| Sex     | product             | 2.00  | 389.53              | 194.76          | 48.40  | 0.000   | 0.59     | 0.02             |
|         | sex                 | 1.00  | 247.89              | 247.89          | 61.60  | 0.000   | 0.38     |                  |
|         | product*sex         | 2.00  | 21.17               | 10.59           | 2.63   | 0.072   | 0.03     |                  |
|         | <i>tot:</i>         |       | 658.59              |                 |        |         |          |                  |
| Age     | product             | 2.00  | 461.04              | 230.52          | 57.01  | 0.000   | 0.58     | 0.02             |
|         | age_classes         | 2.00  | 326.68              | 163.34          | 40.40  | 0.000   | 0.41     |                  |
|         | product*age_classes | 4.00  | 8.66                | 2.17            | 0.54   | 0.710   | 0.01     |                  |
|         | <i>tot:</i>         |       | 796.38              |                 |        |         |          |                  |
| Context | product             | 2.00  | 469.22              | 234.61          | 57.57  | 0.000   | 0.89     | 0.01             |
|         | context             | 2.00  | 16.30               | 8.15            | 2.00   | 0.135   | 0.03     |                  |
|         | product*context     | 4.00  | 41.48               | 10.37           | 2.54   | 0.038   | 0.08     |                  |
|         | <i>tot:</i>         |       | 527.01              |                 |        |         |          |                  |
| Diet    | product             | 2.000 | 151.399             | 75.700          | 18.755 | <0,001  | 0.18     | 0.02             |
|         | diet                | 3.000 | 408.668             | 136.223         | 33.750 | <0,001  | 0.48     |                  |
|         | product*diet        | 6.000 | 298.057             | 49.676          | 12.308 | <0,001  | 0.35     |                  |
|         | <i>tot:</i>         |       | 858.124             |                 |        |         |          |                  |

b). Mixed Models (output of Type III Sum of Squares for variable 'perceived safety'):

|           | Source    | Type   | DF     | Sum of squares (SS) | Mean squares | E(Mean squares)                                 | F      | p value | $\eta^2$ | Partial $\eta^2$ |
|-----------|-----------|--------|--------|---------------------|--------------|-------------------------------------------------|--------|---------|----------|------------------|
| Milk type | subject   | Random | 488.00 | 5454.33             | 11.18        | $\sigma^2 + 35.6356 * \sigma^2(\text{subject})$ | 5.10   | <0,001  | 0.44     | 0.55             |
|           | Milk type | Fixed  | 5.00   | 1719.54             | 343.91       | $\sigma^2 + 2904.3 * Q(\text{type})$            | 156.81 | <0,001  | 0.14     |                  |

|              |            |        |             |          |         |                                    |        |        |      |      |
|--------------|------------|--------|-------------|----------|---------|------------------------------------|--------|--------|------|------|
|              | Error      |        | 2440.00     | 5351.29  | 2.19    | sigma2                             |        |        | 0.43 |      |
|              |            |        | <i>tot:</i> | 12525.17 |         |                                    |        |        |      |      |
| Egg type     | subject    | Random | 464.00      | 6398.19  | 13.79   | sigma2 + 50.8726 * sigma2(subject) | 7.92   | <0,001 | 0.45 | 0.64 |
|              | Egg type   | Fixed  | 6.00        | 2572.23  | 428.71  | sigma2 + 3553.82 * Q(type)         | 246.27 | <0,001 | 0.18 |      |
|              | Error      |        | 2952.00     | 5138.77  | 1.74    | sigma2                             |        |        | 0.36 |      |
|              |            |        | <i>tot:</i> | 14109.20 |         |                                    |        |        |      |      |
| Honey type   | subject    | Random | 464.00      | 4391.80  | 9.47    | sigma2 + 26.0661 * sigma2(subject) | 5.29   | <0,001 | 0.47 | 0.62 |
|              | Honey type | Fixed  | 4.00        | 1331.58  | 332.90  | sigma2 + 2549.26 * Q(type)         | 186.07 | <0,001 | 0.14 |      |
|              | Error      |        | 1976.00     | 3535.27  | 1.79    | sigma2                             |        |        | 0.38 |      |
|              |            |        | <i>tot:</i> | 9258.65  |         |                                    |        |        |      |      |
| Milk origin  | subject    | Random | 464.00      | 3484.56  | 7.51    | sigma2 + 16.7179 * sigma2(subject) | 3.96   | <0,001 | 0.33 | 0.73 |
|              | origin     | Fixed  | 3.00        | 4121.65  | 1373.88 | sigma2 + 2043.77 * Q(origin)       | 724.21 | <0,001 | 0.40 |      |
|              | Error      |        | 1488.00     | 2822.85  | 1.90    | sigma2                             |        |        | 0.27 |      |
|              |            |        | <i>tot:</i> | 10429.06 |         |                                    |        |        |      |      |
| Eggs origin  | subject    | Random | 464.00      | 3398.87  | 7.33    | sigma2 + 16.7179 * sigma2(subject) | 4.20   | <0,001 | 0.34 | 0.74 |
|              | origin     | Fixed  | 3.00        | 3994.16  | 1331.39 | sigma2 + 2043.77 * Q(origin)       | 763.11 | <0,001 | 0.40 |      |
|              | Error      |        | 1488.00     | 2596.09  | 1.74    | sigma2                             |        |        | 0.26 |      |
|              |            |        | <i>tot:</i> | 9989.12  |         |                                    |        |        |      |      |
| Honey origin | subject    | Random | 464.00      | 3719.10  | 8.02    | sigma2 + 16.7179 * sigma2(subject) | 4.54   | <0,001 | 0.37 | 0.74 |
|              | origin     | Fixed  | 3.00        | 3682.75  | 1227.58 | sigma2 + 2043.77 * Q(origin)       | 695.85 | <0,001 | 0.37 |      |
|              | Error      |        | 1488.00     | 2625.06  | 1.76    | sigma2                             |        |        | 0.26 |      |
|              |            |        | <i>tot:</i> | 10026.91 |         |                                    |        |        |      |      |
